# Supplementary material for: Solution-processable Li10GeP2S12 solid electrolyte for a composite electrode in all-solid-state lithium batteries
Source: Royal Society of Chemistry journal article supplement (doi:10.1039/d0se01669a), 2021-01-01
Supplement: d0se01669a1.pdf [file d0se01669a1.pdf]

## Supporting Information

### **Solution-processable $\text{Li}_{10}\text{GeP}_2\text{S}_{12}$ solid electrolyte for composite electrode in all-solid-state lithium batteries**

Genxi Yu, Yaping Wang, Kai Li, Daming Chen, Liguang Qin, Hui Xu, Jian Chen\*,

Wei Zhang, Peigen Zhang, Zhengming Sun\*

Jiangsu Key Laboratory of Advanced Metallic Materials, School of Materials Science and Engineering, Southeast University, Nanjing 211189, P. R. China

\*Corresponding author. \*E-mail: zmsun@seu.edu.cn; j.chen@seu.edu.cn

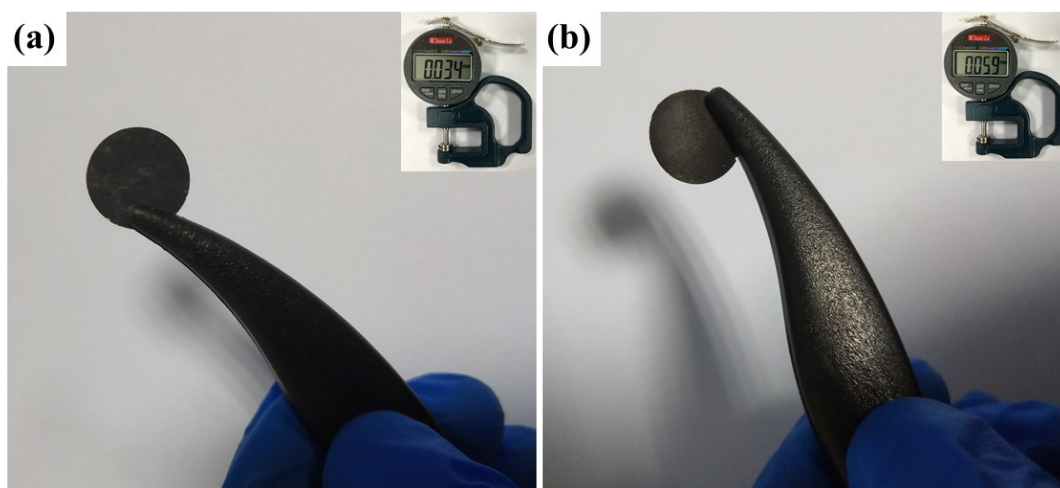

**Figure. S1** (a), (b) photographs of the LCO electrode before and after infiltration of solution-processed LGPS-PVDF, respectively. inset shows the thickness of LCO and LGPS-PVDF@LCO composite electrode.

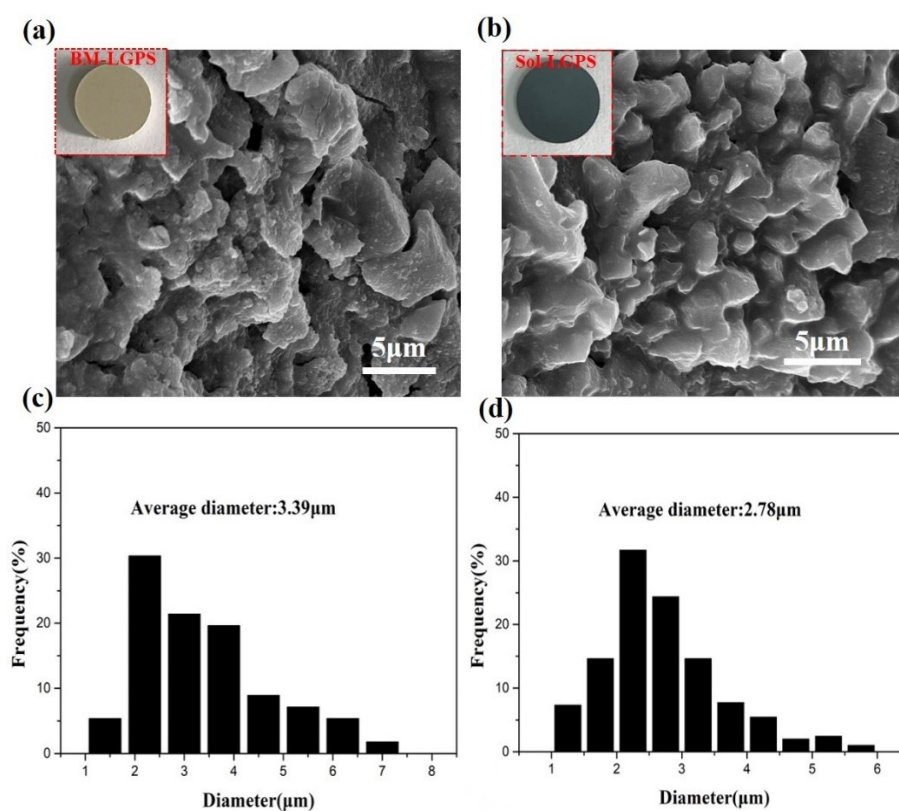

**Figure. S2** (a), (b) Surface SEM images of the BM-LGPS and Sol-LGPS pellets, respectively. The insets in (a) and (b) are the corresponding digital photograph. (c), (d) Distribution of the BM-LGPS and Sol-LGPS particle size, respectively.

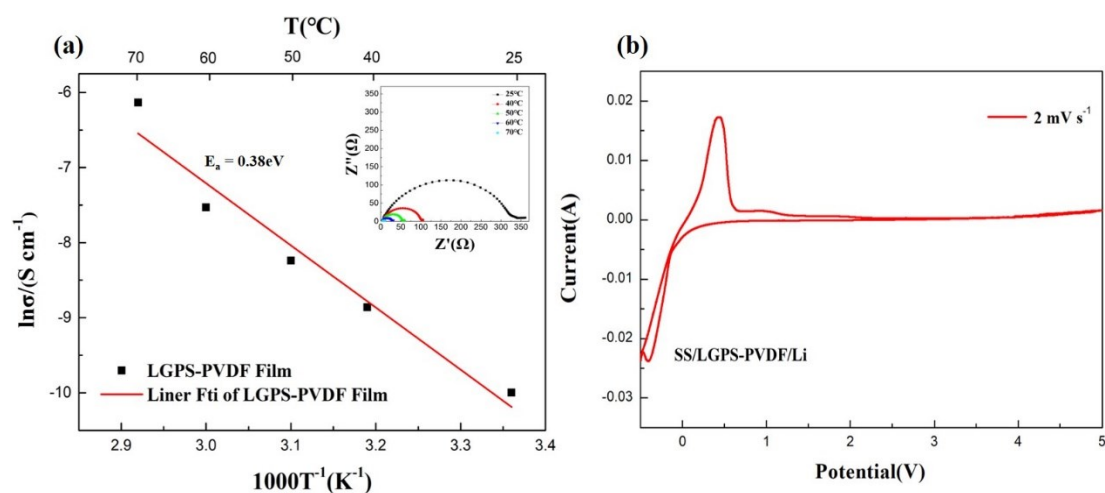

**Figure. S3** (a) Arrhenius plots of the Li<sup>+</sup> ionic conductivity for LGPS-PVDF composite electrolyte. The EIS spectrum at different temperature is shown in the magnified insertion. (b) Cyclic voltammograms of LGPS-PVDF composite electrolyte at a scan rate of  $2 \text{ mV s}^{-1}$  in Li/LGPS-PVDF/SS cell. At  $25^\circ\text{C}$ .

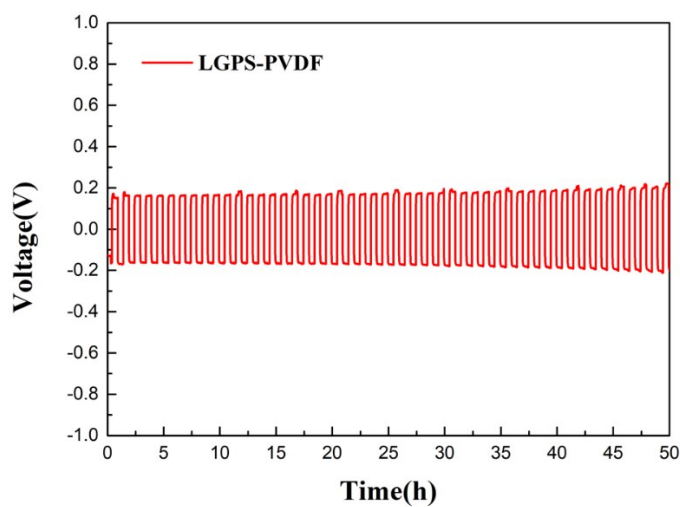

**Figure. S4** Galvanostatic lithium deposition-stripping profiles of a symmetric Li/SE/Li (SE = LGPS-PVDF) cell. Current:  $0.5 \text{ mA cm}^{-2}$  at  $25^\circ\text{C}$ .

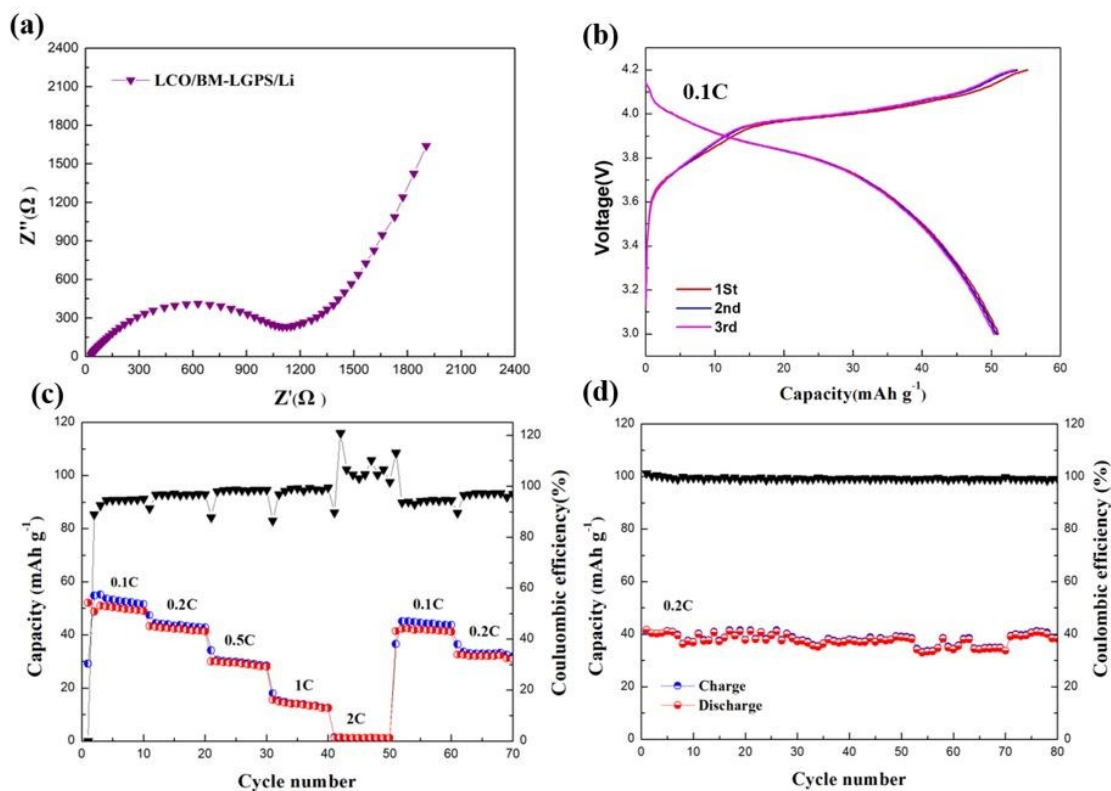

**Figure. S5** Electrochemical characterization of all-solid-state LCO/Li half-cells employing the BM-LGPS electrolyte at 50 °C. (a) Nyquist plots (b) First three cycles charge-discharge voltage profiles at 0.1C ( $\sim 0.14 \text{ mA cm}^{-2}$ ). (c) Rate performances at different current density of 0.1-2.0 C. (d) Cycling performance at 0.2 C for LCO/Li solid-state cells (3.0-4.2 V).
